# Supplementary material for: Long-term follow-up of anti-PD-1 naïve patients with metastatic melanoma treated with IDO/PD-L1 targeting peptide vaccine and nivolumab
Source: HighWire-hosted journal article supplement (doi:10.1136/jitc-2023-006755), 2023-05-01
Supplement: jitc-2023-006755supp001_data_supplement.pdf [file jitc-2023-006755supp001_data_supplement.pdf]

## Supplementary table 1a

| Patient baseline characteristics, Cohort A (n=30) |                     |         |              |             |                        |
|---------------------------------------------------|---------------------|---------|--------------|-------------|------------------------|
| Patient ID                                        | Previous treatment  | M-stage | PD-L1 status | BRAF status | LDH elevation (yes/no) |
| MM1636.01                                         | None                | M1c     | <1%          | Wildtype    | Yes                    |
| MM1636.02                                         | None                | M1a     | <1%          | Mutated     | Yes                    |
| MM1636.03                                         | None                | M1c     | >1%          | Mutated     | Yes                    |
| MM1636.04                                         | 1. line ipilimumab  | M1b     | <1%          | Wildtype    | No                     |
| MM1636.05                                         | None                | M1c     | >1%          | Wildtype    | Yes                    |
| MM1636.06                                         | Adjuvant ipilimumab | M1a     | >1%          | Mutated     | No                     |
| MM1636.07                                         | None                | M1a     | >1%          | Wildtype    | No                     |
| MM1636.08                                         | 1. line ipilimumab  | M1c     | <1%          | Wildtype    | Yes                    |
| MM1636.09                                         | None                | M1c     | <1%          | Wildtype    | No                     |
| MM1636.10                                         | None                | M1c     | >1%          | Mutated     | No                     |
| MM1636.11                                         | None                | M1a     | <1%          | Mutated     | No                     |
| MM1636.12                                         | None                | M1a     | >1%          | Mutated     | No                     |
| MM1636.13                                         | None                | M1c     | >1%          | Wildtype    | Yes                    |
| MM1636.14                                         | None                | M1c     | <1%          | Mutated     | No                     |
| MM1636.15                                         | None                | M1c     | <1%          | Wildtype    | Yes                    |
| MM1636.16                                         | None                | M1c     | > 1%         | Mutated     | No                     |
| MM1636.17                                         | None                | M1b     | > 1%         | Wildtype    | No                     |
| MM1636.18                                         | None                | M1b     | < 1%         | Wildtype    | No                     |
| MM1636.20                                         | None                | M1c     | < 1%         | Mutated     | No                     |
| MM1636.22                                         | None                | M1b     | >1%          | Wildtype    | No                     |
| MM1636.23                                         | None                | M1c     | <1%          | Wildtype    | No                     |
| MM1636.24                                         | None                | M1c     | >1%          | Wildtype    | No                     |
| MM1636.27                                         | None                | M1c     | >1%          | Mutated     | No                     |
| MM1636.29                                         | None                | M1b     | > 1%         | Wildtype    | No                     |
| MM1636.34                                         | None                | M1c     | < 1%         | Wildtype    | Yes                    |
| MM1636.35                                         | None                | M1c     | > 1%         | Wildtype    | Yes                    |
| MM1636.37                                         | None                | M1a     | <1%          | Mutated     | No                     |
| MM1636.38                                         | None                | M1a     | >1%          | Wildtype    | Yes                    |
| MM1636.39                                         | None                | M1b     | >1%          | Wildtype    | No                     |
| MM1636.42                                         | None                | M1c     | >1%          | Wildtype    | Yes                    |

## Supplementary table 1b

| Sub-group information, Cohort A (n=30) |                 |               |                     |                     |                               |                           |
|----------------------------------------|-----------------|---------------|---------------------|---------------------|-------------------------------|---------------------------|
| Characteristic - no.                   | M1a+b<br>(n=13) | M1c<br>(n=17) | PD-L1 >1%<br>(n=17) | PD-L1 <1%<br>(n=13) | LDH<br>non-elevated<br>(n=19) | LDH<br>elevated<br>(n=11) |
| <b>Previous treatment</b>              |                 |               |                     |                     |                               |                           |
| None                                   | 11              | 16            | 16                  | 11                  | 17                            | 10                        |
| 1. line ipilimumab                     | 1               | 1             | 0                   | 2                   | 1                             | 1                         |
| Adjuvant ipilimumab                    | 1               | 0             | 1                   | 0                   | 1                             | 0                         |
| <b>BRAF status</b>                     |                 |               |                     |                     |                               |                           |
| Mutated                                | 5               | 6             | 6                   | 5                   | 9                             | 2                         |
| Wildtype                               | 8               | 11            | 11                  | 8                   | 10                            | 9                         |
| <b>LDH status</b>                      |                 |               |                     |                     |                               |                           |
| Elevated                               | 2               | 9             | 6                   | 5                   |                               |                           |
| Non-elevated                           | 11              | 8             | 11                  | 8                   |                               |                           |
| <b>PD-L1 status</b>                    |                 |               |                     |                     |                               |                           |
| <1%                                    | 5               | 8             |                     |                     | 8                             | 5                         |
| >1%                                    | 8               | 9             |                     |                     | 11                            | 6                         |
| <b>M stage</b>                         |                 |               |                     |                     |                               |                           |
| M1a+b                                  |                 |               | 8                   | 5                   | 8                             | 2                         |
| M1c                                    |                 |               | 9                   | 8                   | 11                            | 9                         |

## Supplementary table 2

| Detailed treatment information, Cohort A (n=30) |     |                 |                                  |                                   |                                   |                                   |
|-------------------------------------------------|-----|-----------------|----------------------------------|-----------------------------------|-----------------------------------|-----------------------------------|
| Patient ID                                      | BOR | vaccines series | Number nivolumab series (3mg/kg) | Number nivolumab series (6 mg/kg) | Reason to stop treatment          | Subsequent treatment              |
| MM1636.01                                       | CR  | 15              | 24                               | 5                                 | Grade 3 rash                      |                                   |
| MM1636.02                                       | PD  | 5               | 5                                |                                   | Progression                       | Dabrafenib/Trametinib             |
| MM1636.03                                       | CR  | 15              | 24                               | 9                                 | Maximum benefit                   | None                              |
| MM1636.04                                       | PD  | 5               | 5                                |                                   | Progression                       | Radiotherapy, Temodal             |
| MM1636.05                                       | CR  | 13              | 21                               |                                   | Grade 2 pneumonitis               | None                              |
| MM1636.06                                       | CR  | 15              | 24                               | 9                                 | Progression                       | Dabrafenib/Trametinib             |
| MM1636.07                                       | CR  | 8               | 12                               | 2                                 | Grade 2 pneumonitis               | Reinduction Nivolumab             |
| MM1636.08                                       | PR  | 11              | 16                               |                                   | Progression                       | Ipilimumab, Radiotherapy          |
| MM1636.09                                       | PD  | 5               | 5                                |                                   | Progression                       | None                              |
| MM1636.10                                       | PR  | 15              | 24                               | 7                                 | Progression                       | Encorafenib/Binimetinib           |
| MM1636.11                                       | PD  | 3               | 3                                |                                   | Progression                       | Dabrafenib/Trametinib, Ipilimumab |
| MM1636.12                                       | CR  | 15              | 24                               | 8                                 | Maximum benefit                   | None                              |
| MM1636.13                                       | PR  | 15              | 24                               | 13                                | Reached 2 years of treatment      | None                              |
| MM1636.14                                       | CR  | 11              | 16                               |                                   | Grade 2 colitis                   | None                              |
| MM1636.15                                       | PR  | 15              | 24                               | 11                                | Reached 2 years of treatment      | None                              |
| MM1636.16                                       | PR  | 9               | 12                               |                                   | Progression                       | T cell therapy CT ID: NCT02278887 |
| MM1636.17                                       | PD  | 6               | 6                                |                                   | Progression                       | None                              |
| MM1636.18                                       | CR  | 5               | 5                                |                                   | Grade 5 toxicity due to nivolumab | None                              |
| MM1636.20                                       | CR  | 11              | 18                               | 2                                 | Maximum benefit                   | None                              |
| MM1636.22                                       | CR  | 15              | 24                               | 1                                 | Grade 3 arthralgia                | None                              |
| MM1636.23                                       | CR  | 15              | 24                               | 3                                 | Maximum benefit                   | None                              |
| MM1636.24                                       | CR  | 15              | 24                               |                                   | Maximum benefit                   | None                              |
| MM1636.27                                       | CR  | 15              | 24                               | 3                                 | Maximum benefit                   | Encorafenib/Binimetinib           |
| MM1636.29                                       | PR  | 15              | 24                               | 4                                 | Apoplexia and Grade 3 hepatitis   | Pembrolizumab                     |
| MM1636.34                                       | PD  | 3               | 3                                |                                   | Progression                       | None                              |
| MM1636.35                                       | PR  | 15              | 24                               | 10                                | Reached 2 years of treatment      | None                              |
| MM1636.37                                       | PR  | 7               | 8                                |                                   | Progression                       | Encorafenib/Binimetinib           |
| MM1636.38                                       | CR  | 14              | 23                               |                                   | Maximum benefit                   |                                   |
| MM1636.39                                       | CR  | 13              | 19                               |                                   | Grade 2 dermatitis                |                                   |
| MM1636.42                                       | PR  | 15              | 24                               | 9                                 | Reached 1,5 years of treatment    |                                   |

## Supplementary table 3

| Immune-related adverse events, Cohort A (n=30) |           |     |           |    |
|------------------------------------------------|-----------|-----|-----------|----|
|                                                | Grade 1-2 | %   | Grade 3-4 | %  |
| <b>Vaccine related</b>                         |           |     |           |    |
| Granuloma (injection site)                     | 20        | 67% |           |    |
| Injection site reactions                       | 23        | 77% |           |    |
| Redness (injection site)                       | 7         | 23% |           |    |
| Pruritus (injection site)                      | 4         | 13% |           |    |
| Pain (injection site)                          | 4         | 13% |           |    |
| Myalgia (injection site)                       | 1         | 3%  |           |    |
| <b>Respiratory</b>                             |           |     |           |    |
| Pneumonitis                                    | 4         | 13% |           |    |
| Pleural effusion                               | 1         | 3%  |           |    |
| Dyspnoea                                       | 7         | 23% |           |    |
| <b>Gastrointestinal</b>                        |           |     |           |    |
| Diarrhoea                                      | 9         | 30% | 1         | 3% |
| Constipation                                   | 2         | 7%  |           |    |
| Abdominal pain                                 | 4         | 13% |           |    |
| Colitis                                        | 2         | 7%  | 1         | 3% |
| <b>Musculoskeletal</b>                         |           |     |           |    |
| Arthralgia                                     | 9         | 30% | 2         | 7% |
| Myalgia                                        | 5         | 17% |           |    |
| <b>Endocrinal</b>                              |           |     |           |    |
| Adrenal insufficiency                          | 2         | 7%  | 1         | 3% |
| Hypophysitis                                   | 2         | 7%  |           |    |
| Hypothyroidism                                 | 1         | 3%  |           |    |
| Hyperthyroidism                                | 2         | 7%  |           |    |
| <b>Skin</b>                                    |           |     |           |    |
| Dry skin                                       | 8         | 27% |           |    |
| Rash                                           | 14        | 47% | 2         | 7% |
| Vitiligo                                       | 4         | 13% |           |    |
| Pruritus                                       | 8         | 27% |           |    |
| Vasculitis                                     | 1         | 3%  |           |    |
| <b>Laboratory tests</b>                        |           |     |           |    |
| Increase ALAT                                  | 4         | 13% |           |    |
| Increased amylase                              | 6         | 20% |           |    |
| Hyponatremia                                   |           |     | 1         | 3% |
| <b>Other</b>                                   |           |     |           |    |
| Infusion reaction                              | 5         | 17% |           |    |
| Fatigue                                        | 17        | 47% |           |    |
| Xerostomia                                     | 5         | 17% |           |    |
| Nausea                                         | 8         | 27% |           |    |
| Stomatitis                                     | 2         | 7%  |           |    |
| Periorbital oedema                             | 1         | 3%  |           |    |
| Nasal congestion                               | 2         | 7%  |           |    |
| Peripheral neuropathy                          | 1         | 3%  |           |    |
| Dry eyes                                       | 1         | 3%  |           |    |
| Hearing impaired                               | 1         | 3%  |           |    |

## Supplementary table 4

| Detailed patient baseline characteristics, Cohort B (n=10) |         |                                                                                  |           |             |              |
|------------------------------------------------------------|---------|----------------------------------------------------------------------------------|-----------|-------------|--------------|
| Patient ID                                                 | M-stage | Metastatic sites at baseline                                                     | LDH (U/L) | BRAF status | PD-L1 status |
| MM1636.21                                                  | M1b     | lungs, pleura                                                                    | 202       | Wild-type   | < 1%         |
| MM1636.26                                                  | M1a     | subcutis, intramuscular, cutis, toe                                              | 187       | Wild-type   | < 1%         |
| MM1636.30                                                  | M1c     | lungs, lymph nodes, subcutis, pancreas, spleen, liver, kidney, peritoneum, bones | 324       | Wild-type   | ?            |
| MM1636.31                                                  | M1b     | lungs                                                                            | 156       | Wild-type   | < 1%         |
| MM1636.32                                                  | M1a     | subcutis, cutis                                                                  | 159       | Wild-type   | < 1%         |
| MM1636.33                                                  | M1c     | adrenal glands, lungs                                                            | 216       | Wild-type   | > 1%         |
| MM1636.41                                                  | M1b     | lung, muscle, subcutis                                                           | 162       | Wild-type   | ?            |
| MM1636.47                                                  | M1a     | lymph nodes                                                                      | 169       | Wild-type   | > 1%         |
| MM1636.48                                                  | M1a     | subcutis, lymph nodes                                                            | 160       | Wild-type   | < 1%         |
| MM1636.49                                                  | M1b     | lungs                                                                            | 167       | Wild-type   | > 1%         |

## Supplementary table 5

| Treatment details, Cohort B (n=10) |     |                           |                           |          |                                 |                                                                                           |                                                                   |
|------------------------------------|-----|---------------------------|---------------------------|----------|---------------------------------|-------------------------------------------------------------------------------------------|-------------------------------------------------------------------|
| Patient ID                         | BOR | Nivolumab cycles (3mg/kg) | Nivolumab cycles (6mg/kg) | Vaccines | Rational for stopping treatment | Prior treatment                                                                           | Subsequent treatment                                              |
| MM1636.21                          | PD  | 6                         |                           | 6        | PD                              | Pembrolizumab (7 cycles)                                                                  | Ipilimumab                                                        |
| MM1636.26                          | PD  | 6                         |                           | 6        | PD                              | Nivolumab (5 cycles)                                                                      | Ipilimumab                                                        |
| MM1636.30                          | PD  | 4                         |                           | 4        | PD                              | Ipilimumab (4 cycles), Pembrolizumab (16 cycles), IL-2 (4 cycles) Temozolomide (6 cycles) | None                                                              |
| MM1636.31                          | PD  | 6                         |                           | 6        | PD                              | Pembrolizumab (16 cycles)                                                                 | Ipilimumab, Phase I Robust trial, BP41628, PD1-IL2v. Temozolomide |
| MM1636.32                          | PD  | 6                         |                           | 6        | PD                              | Nivolumab (5 cycles)                                                                      | Ipilimumab                                                        |
| MM1636.33                          | SD  | 10                        | 1                         | 9        | PD                              | Pembrolizumab (4 cycles) Ipilimumab (3 cycles)                                            | Temozolomide                                                      |
| MM1636.41                          | PD  | 6                         |                           | 6        | PD                              | Nivolumab (7 cycles)                                                                      | Ipilimumab                                                        |
| MM1636.47                          | SD  | 12                        |                           | 9        | PD                              | Pembrolizumab (7 cycles)                                                                  | Ipilimumab                                                        |
| MM1636.48                          | PD  | 4                         |                           | 4        | PD                              | Pembrolizumab (9 cycles)                                                                  | None                                                              |
| MM1636.49                          | PD  | 5                         |                           | 5        | Treatment ongoing               | Pembrolizumab (6 cycles)                                                                  | Ipilimumab                                                        |

## Supplementary table 6

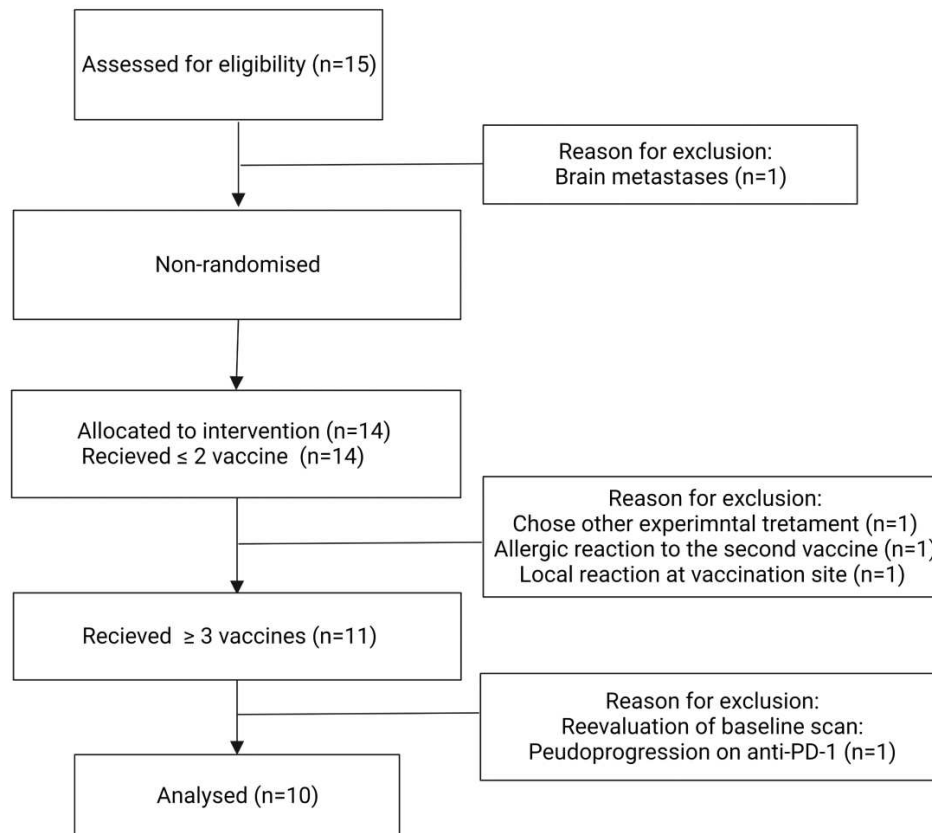

## Supplementary table 7

| Immune-related adverse events, Cohort B (n=10) |           |     |           |     |
|------------------------------------------------|-----------|-----|-----------|-----|
|                                                | Grade 1-2 | %   | Grade 3-4 | %   |
| <b>Vaccine-related</b>                         |           |     |           |     |
| Granuloma (injection site)                     | 4         | 40% |           |     |
| Injection site reaction                        | 4         | 40% |           |     |
| Redness (injection site)                       | 1         | 10% |           |     |
| Pruritus (injection site)                      | 3         | 30% |           |     |
| <b>Respiratory</b>                             |           |     |           |     |
| Pleural effusion                               | 1         | 10% |           |     |
| Dyspnoea                                       | 1         | 10% |           |     |
| <b>Gastrointestinal</b>                        |           |     |           |     |
| Diarrhoea                                      | 2         | 20% |           |     |
| Constipation                                   | 1         | 10% |           |     |
| Abdominal pain                                 | 2         | 20% |           |     |
| <b>Endocrinal</b>                              |           |     |           |     |
| Adrenal insufficiency                          |           |     | 1         | 10% |
| Hypophysitis                                   |           |     | 1         | 10% |
| <b>Skin</b>                                    |           |     |           |     |
| Rash                                           | 1         | 10% |           |     |
| Dry skin                                       | 3         | 30% |           |     |
| Pruritus                                       | 2         | 20% |           |     |
| Vitiligo                                       | 1         | 10% |           |     |
| <b>Laboratory tests</b>                        |           |     |           |     |
| Increased amylase                              | 2         | 20% |           |     |
| Hyponatremia                                   |           |     | 1         | 10% |
| <b>Infusion reaction</b>                       |           |     |           |     |
| <b>Other</b>                                   |           |     |           |     |
| Fatigue                                        | 3         | 30% |           |     |
| Nausea                                         | 3         | 30% |           |     |
| Xerostomia                                     | 1         | 10% |           |     |
